# Supplementary material
Source: PubMed Central journal article supplement (PMC9348149)

Supplementary Figures

Figure S1- Monthly number of patients who had in-person or telehealth appointment, stratified by gender

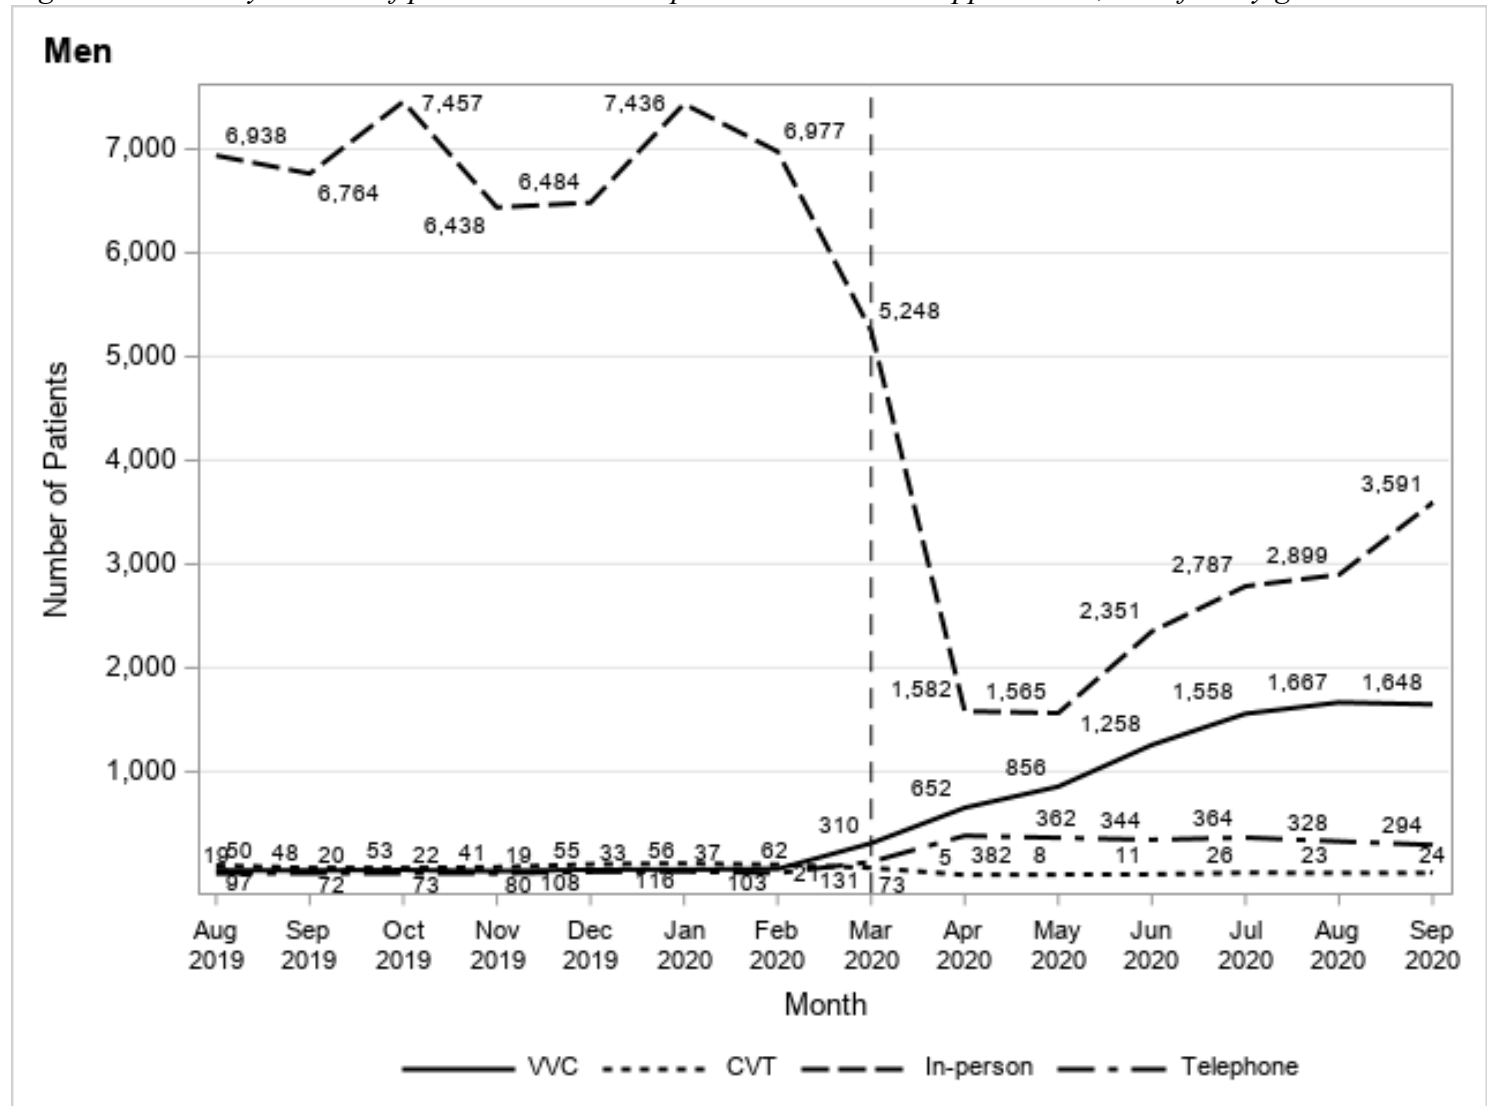

# Women

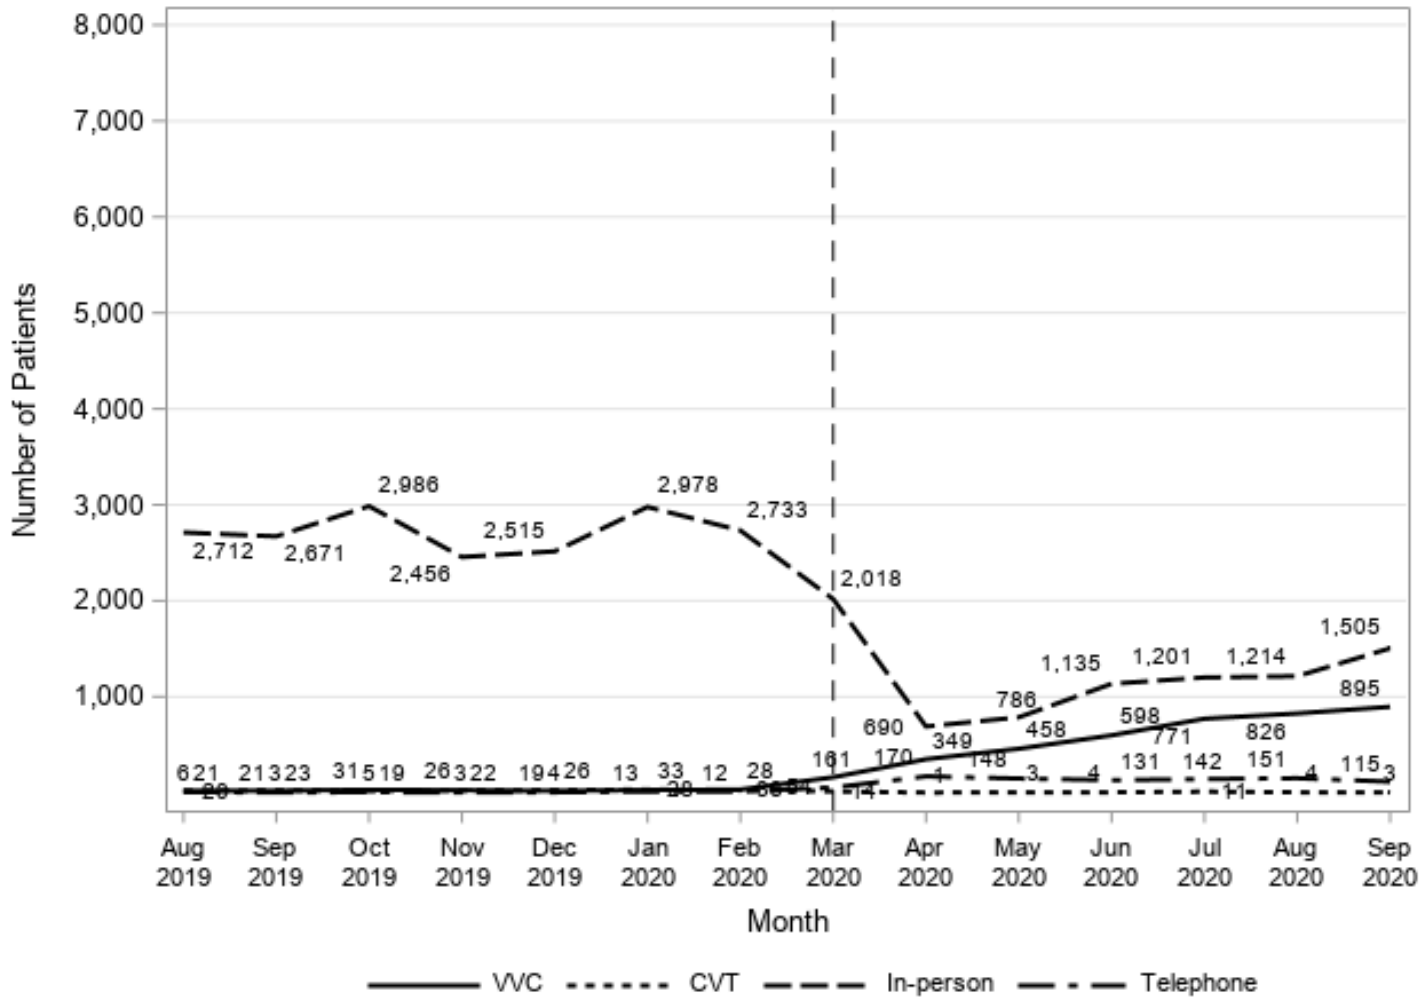

Figure S2 - Monthly number of patients who had in-person or telehealth appointment, stratified by age group

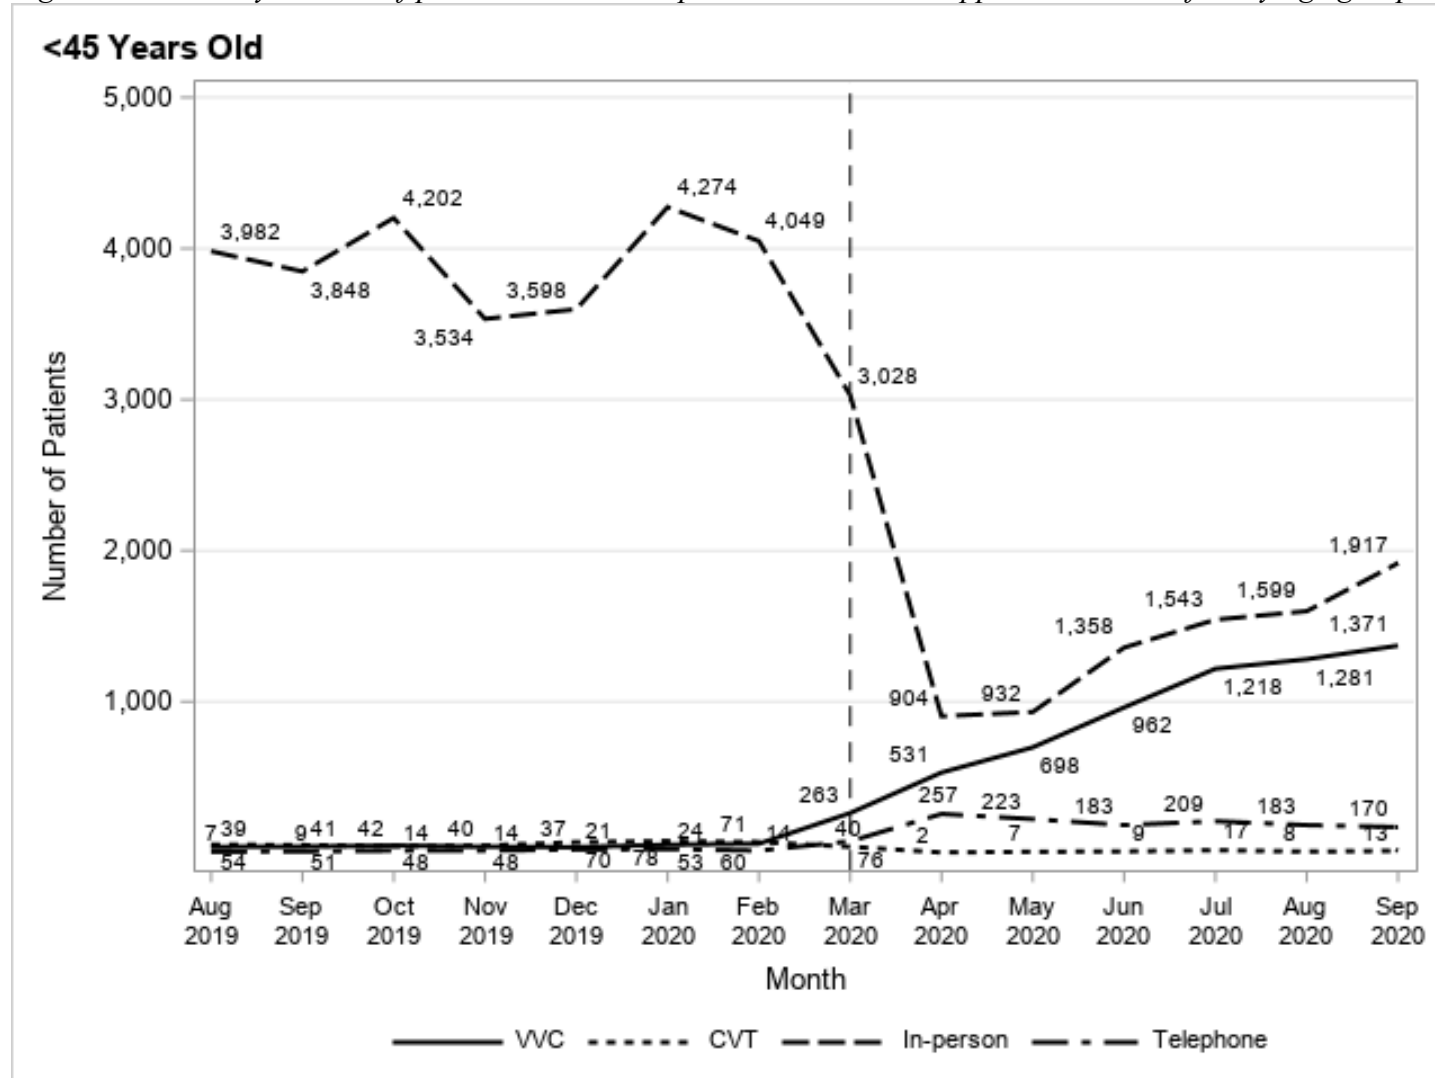

### 45 - 64 Years Old

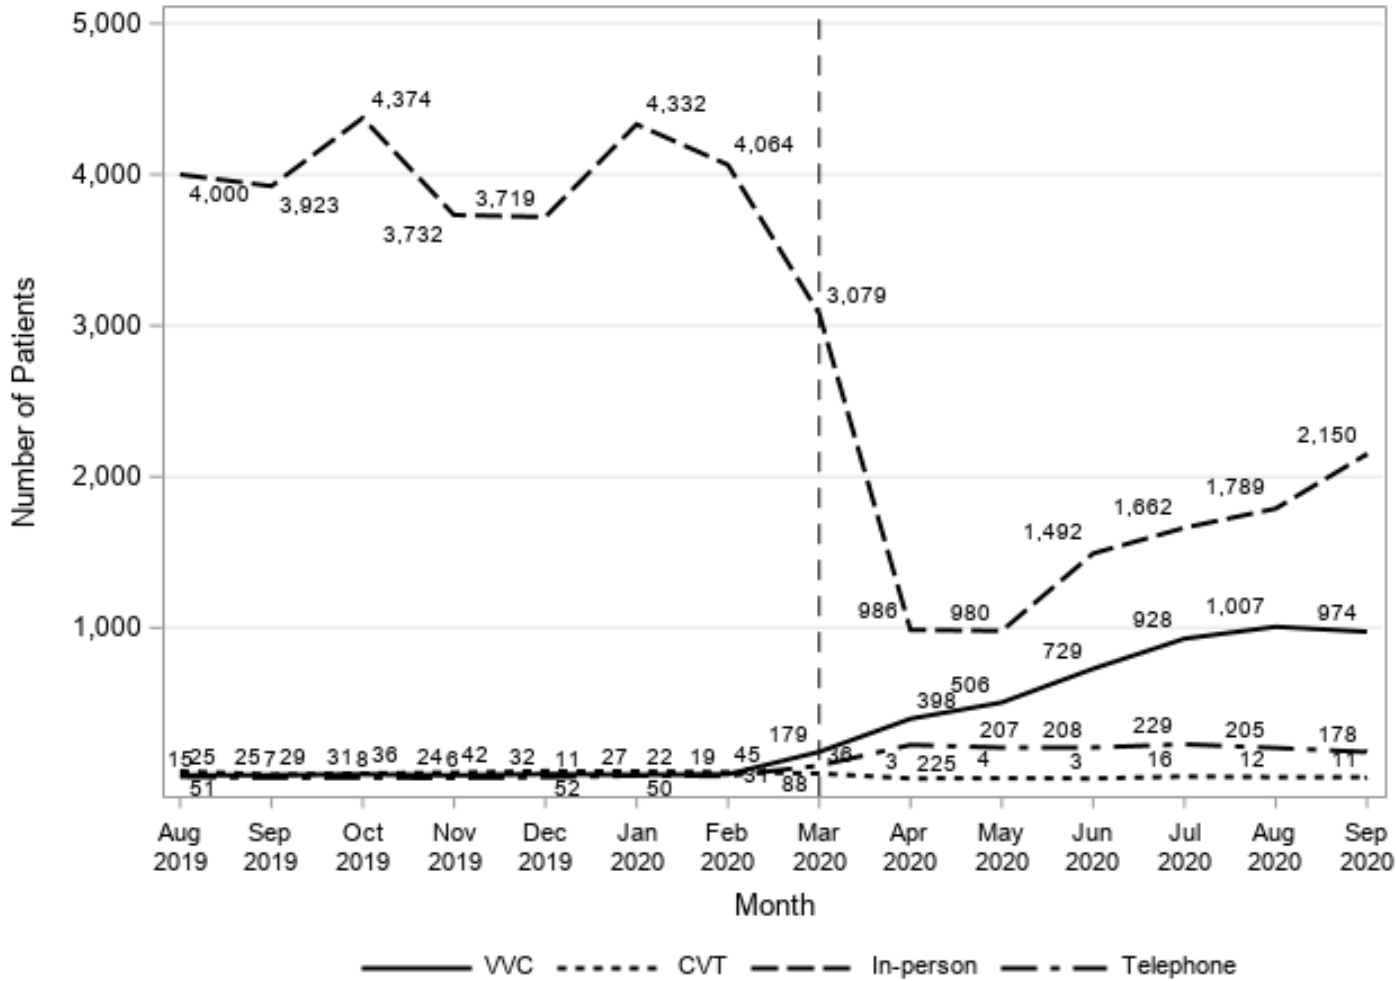

### ≥65 Years Old

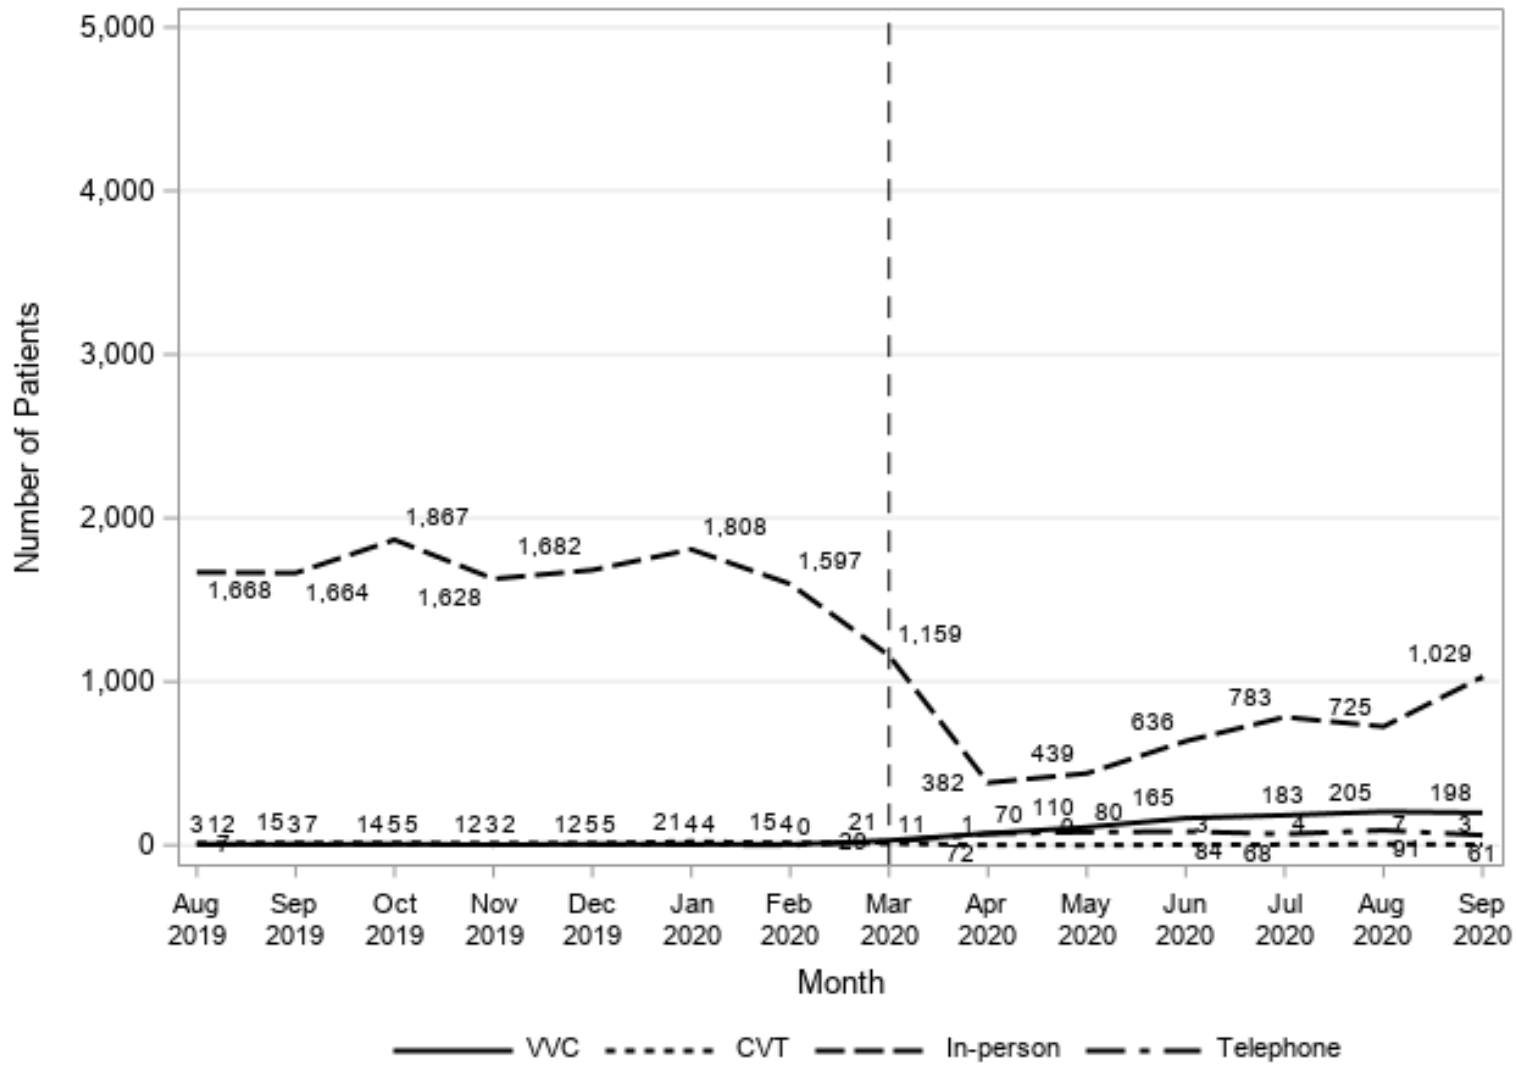

Figure S3 - Monthly number of patients who had in-person or telehealth appointment, stratified by race/ethnicity

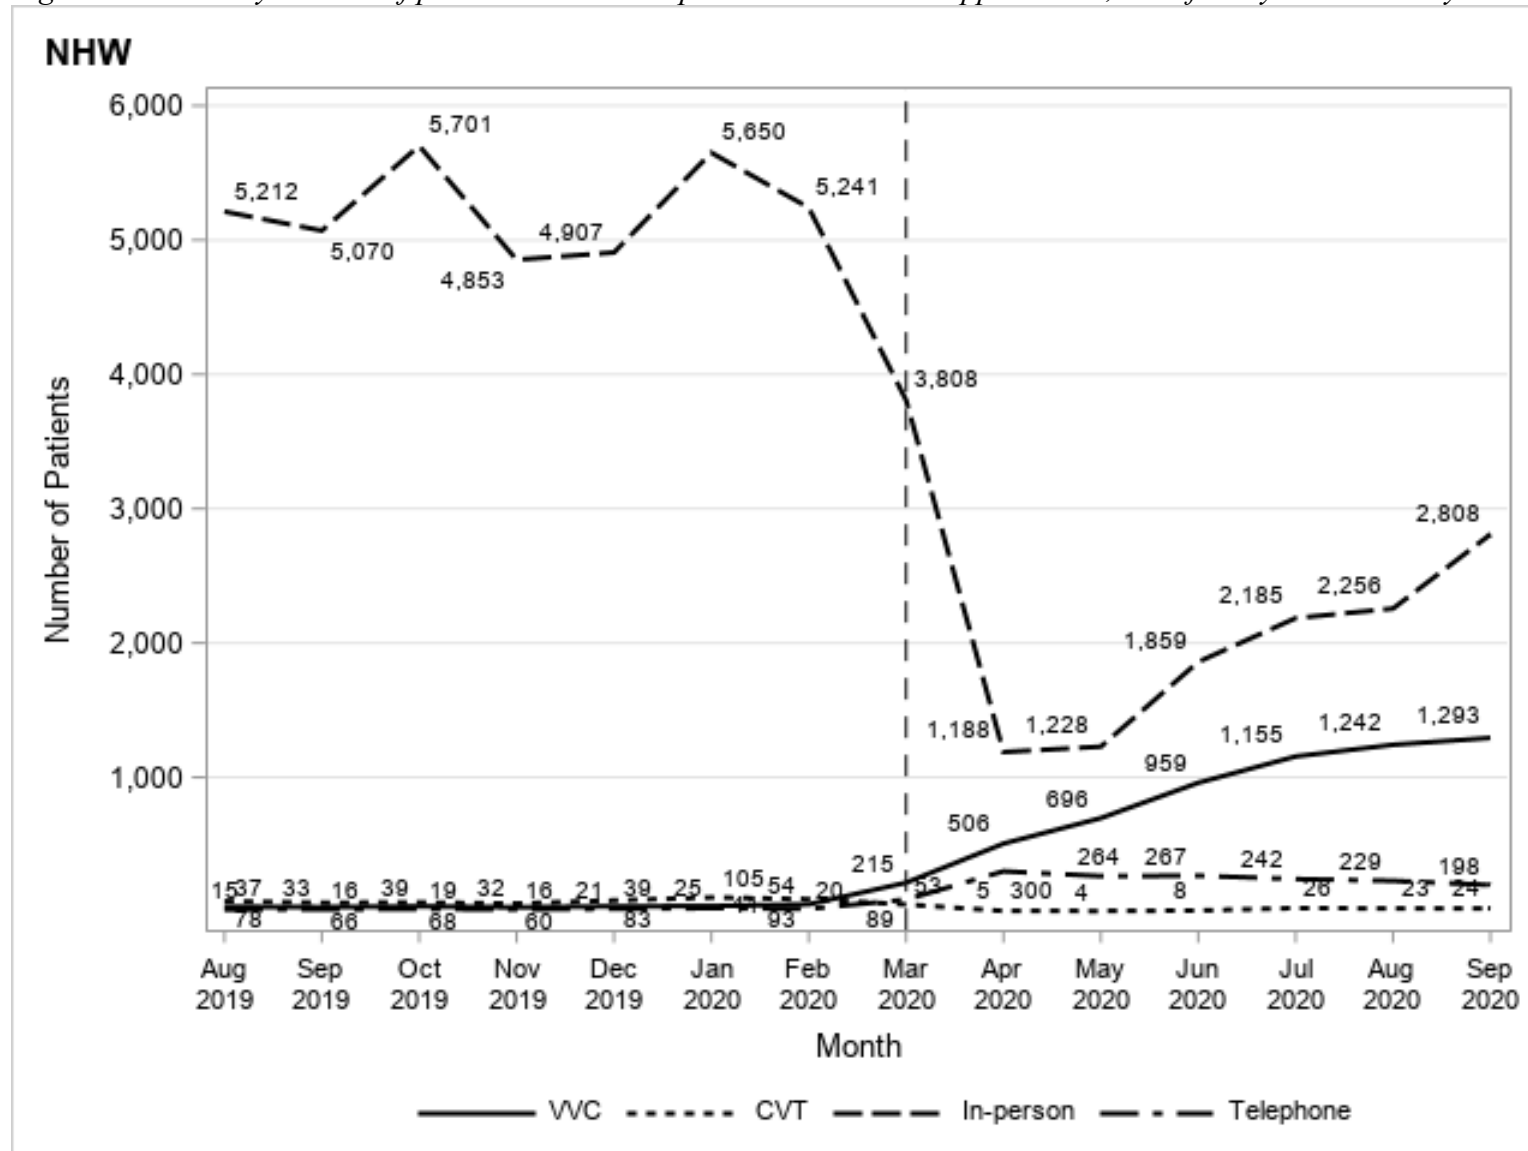

# NHB

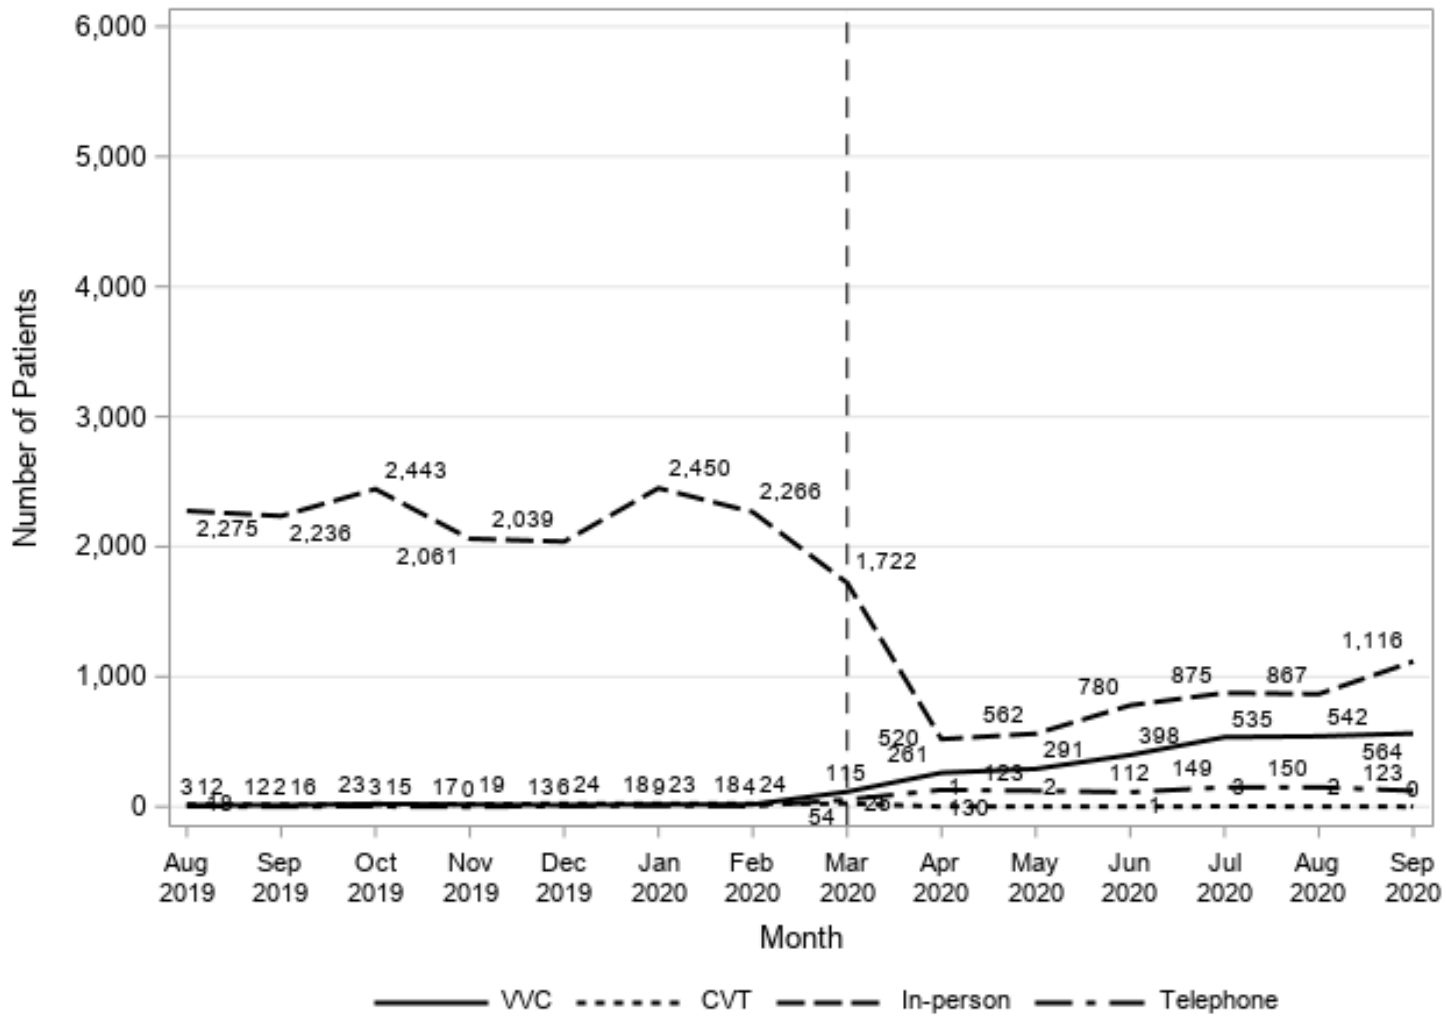

# Hispanic

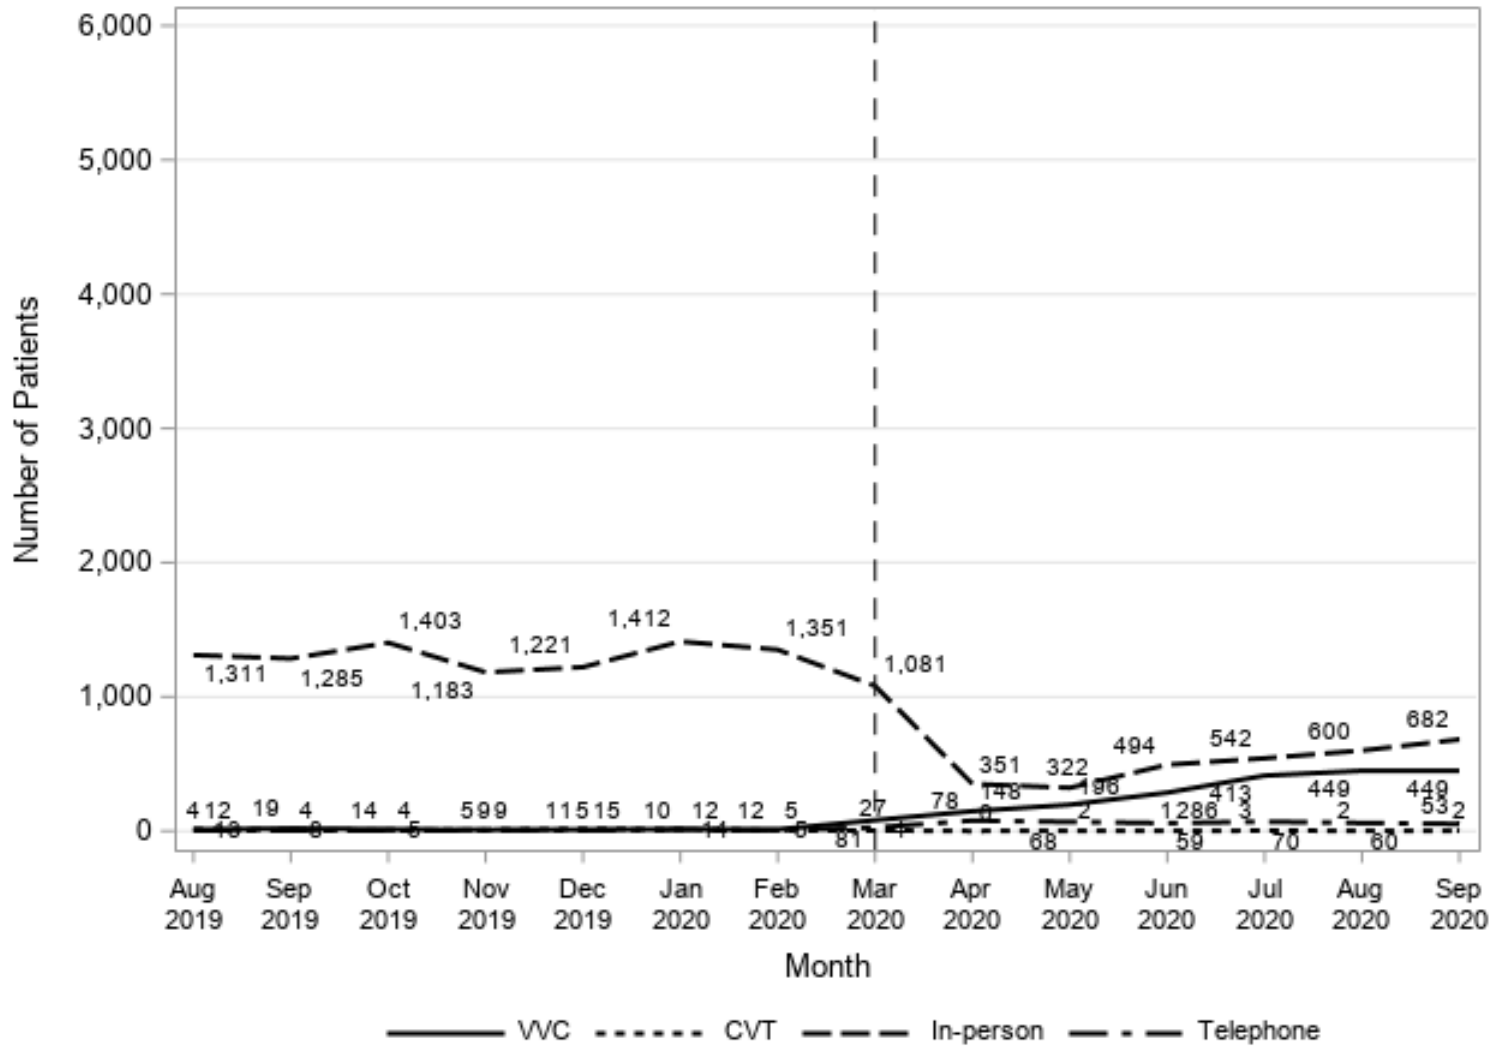



# Other

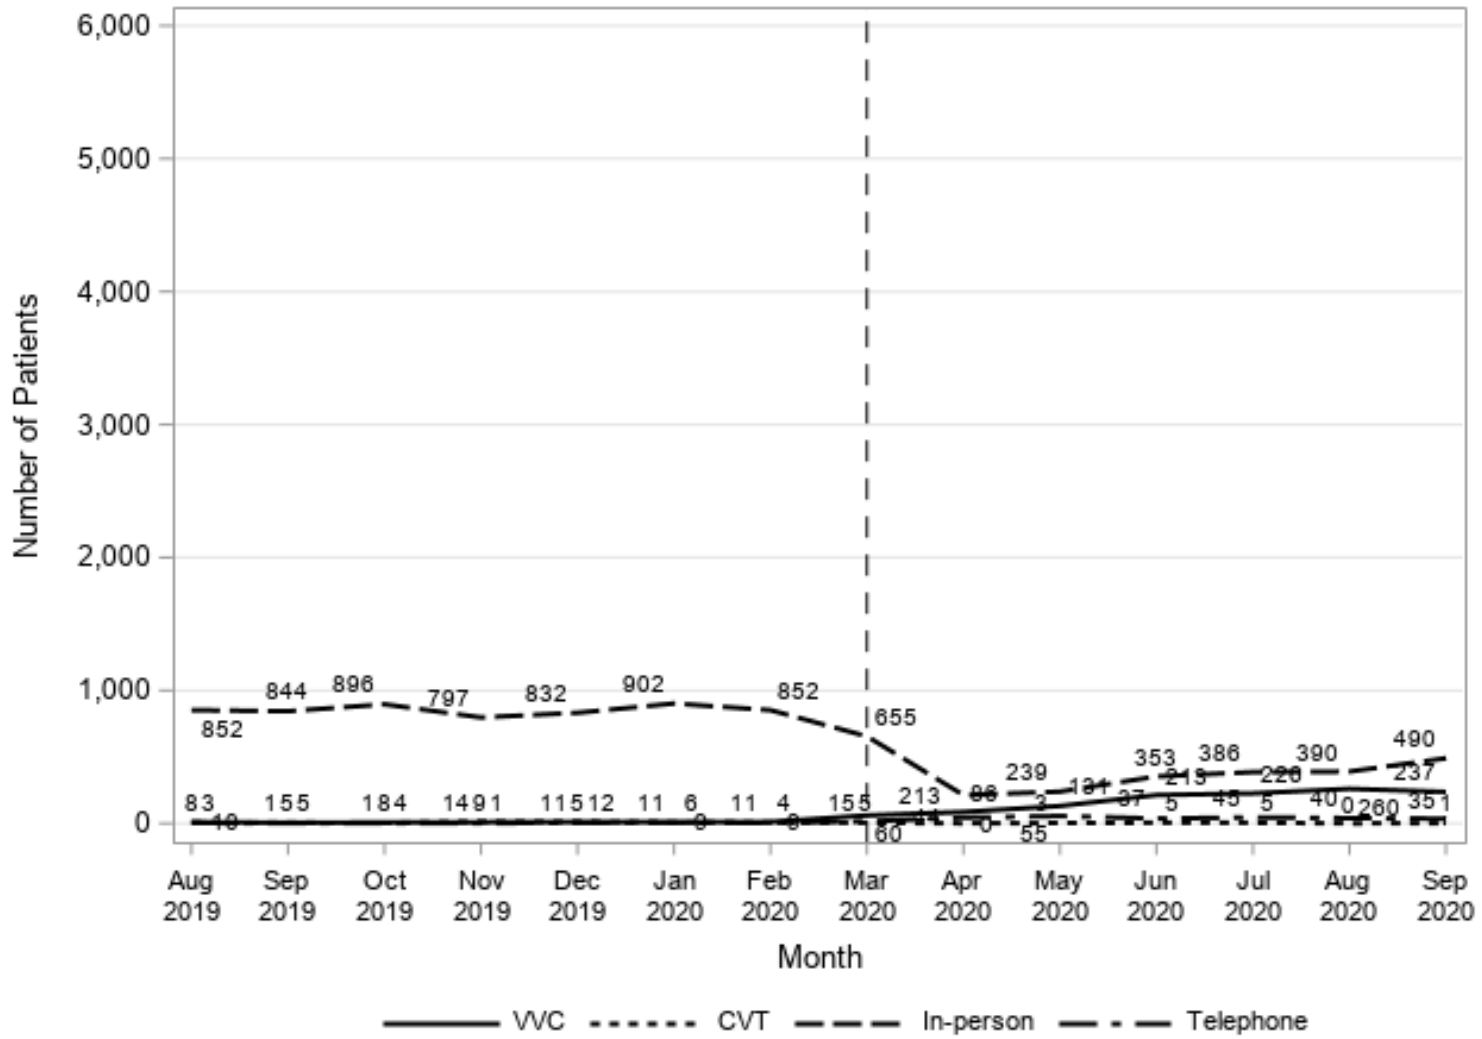

Figure S4 - Monthly number of patients who had in-person or telehealth appointment, stratified by rurality

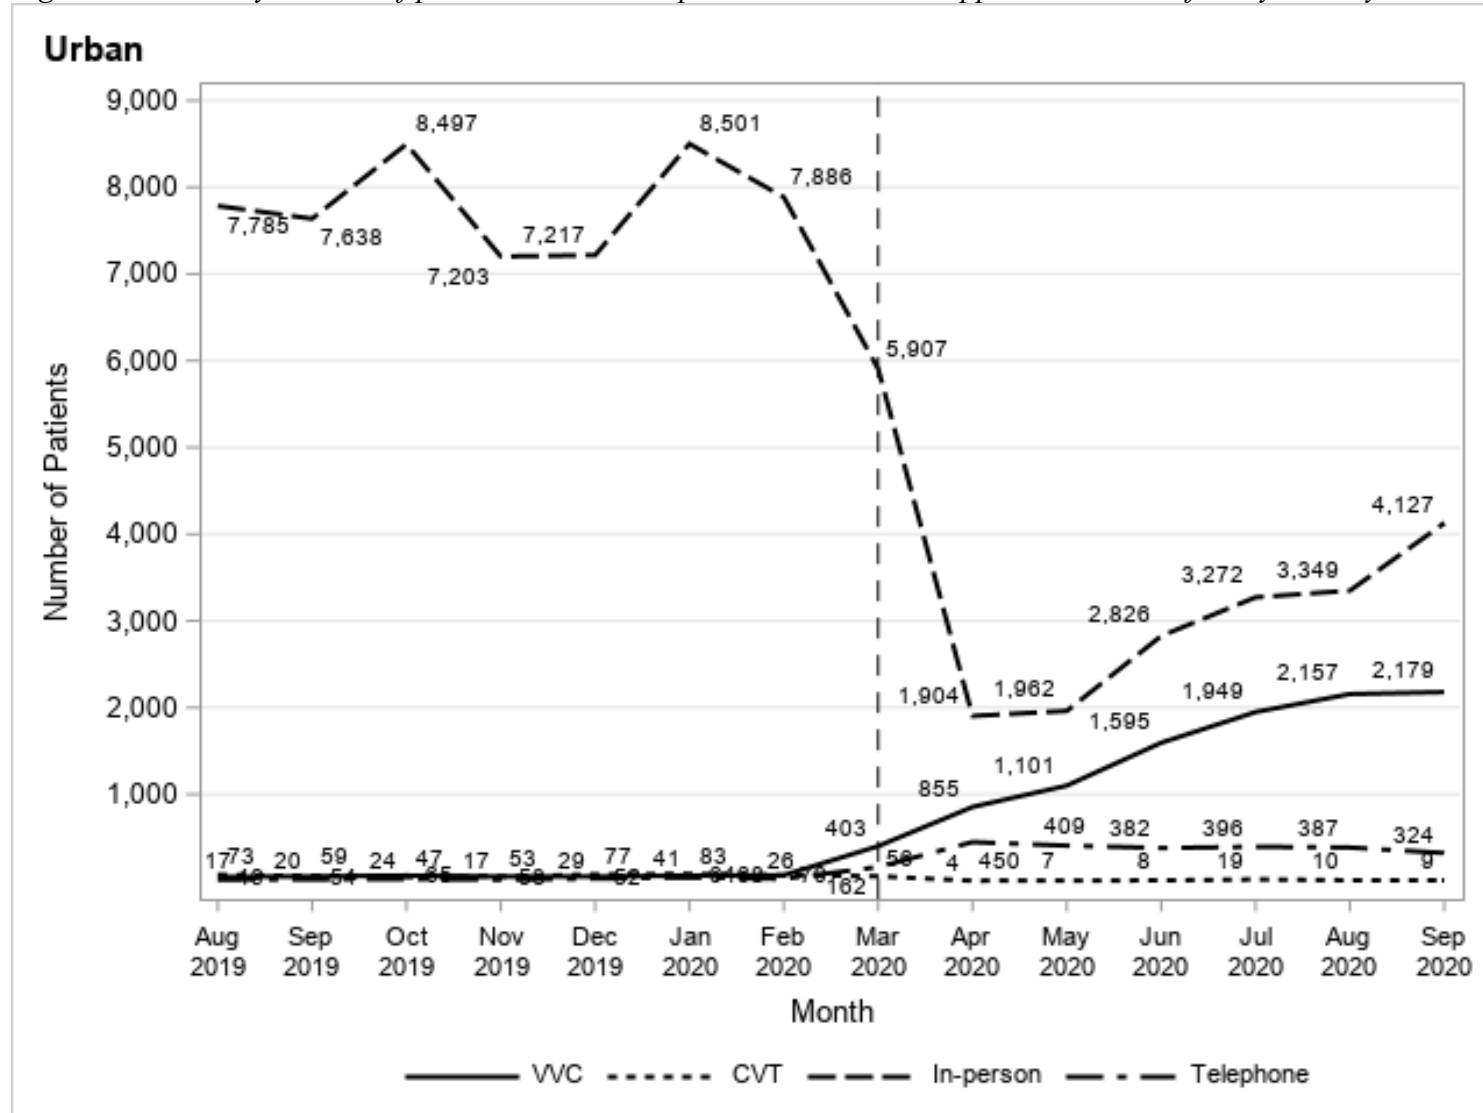

# Rural

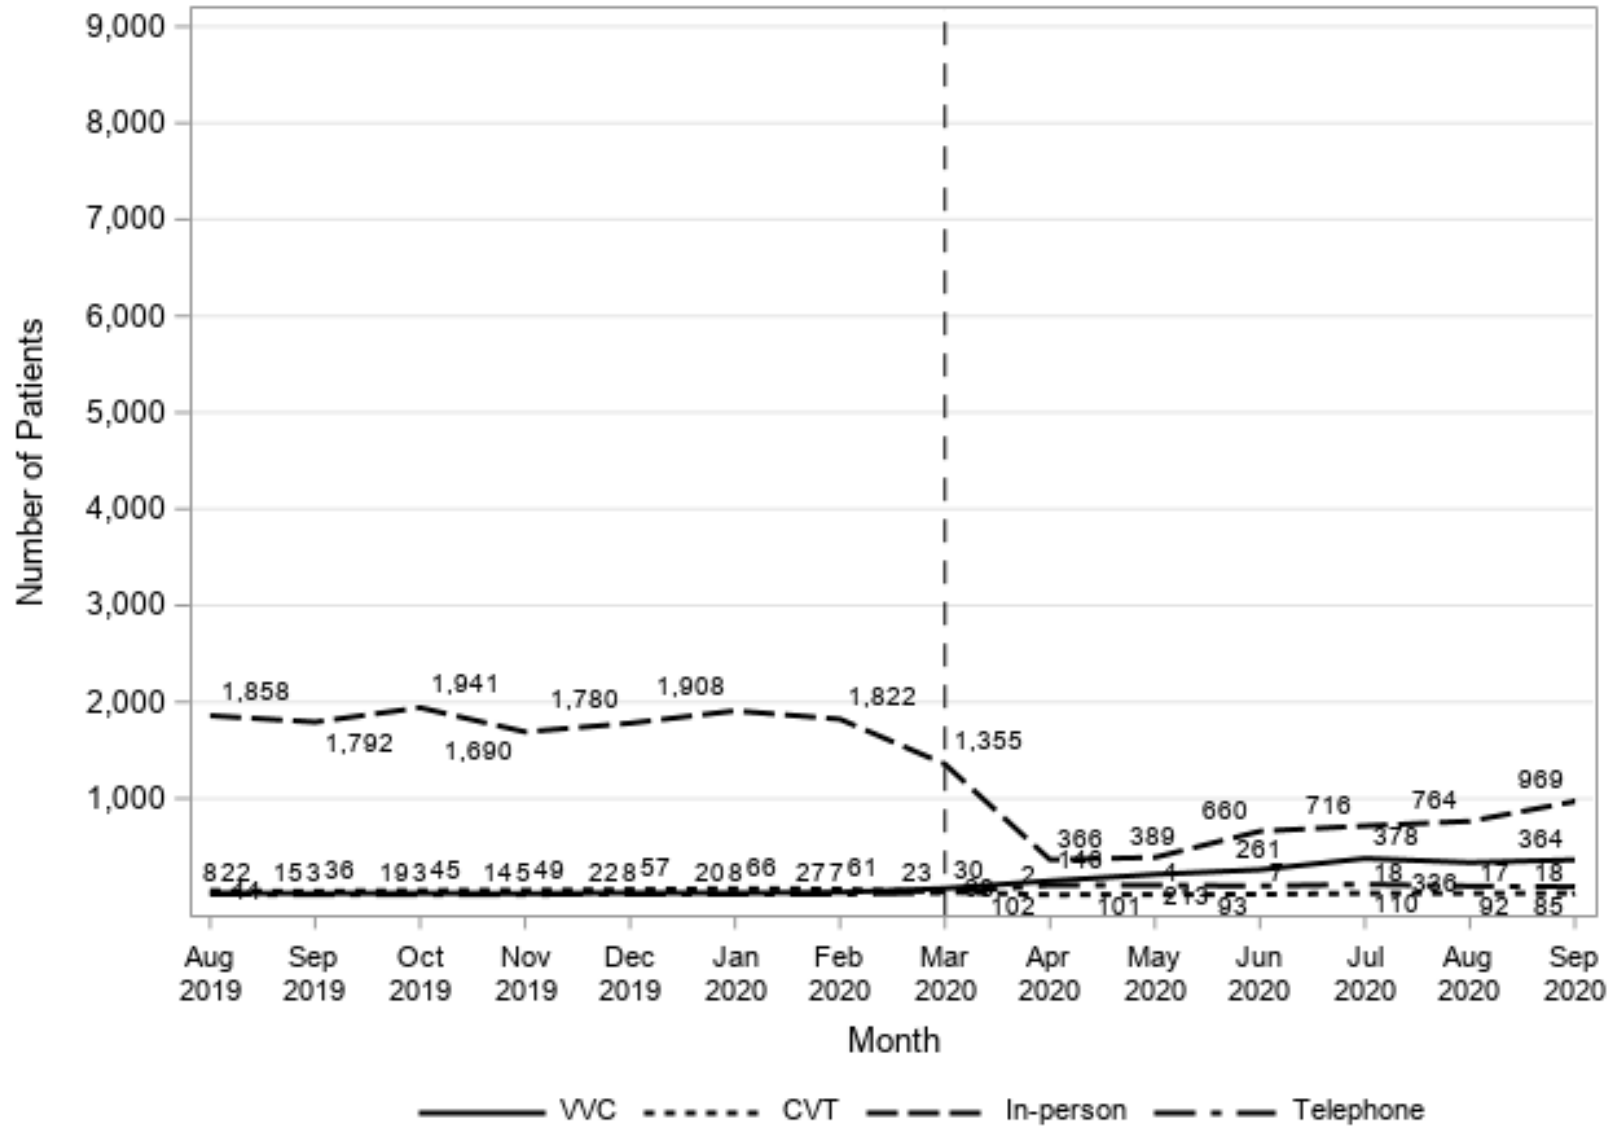

Supplement: HEAD-62-613-s002.pdf [file HEAD-62-613-s002.pdf]
